# Supplementary material
Source: publisher figshare collection journal article supplement (https://sage.figshare.com/ndownloader/files/12801350)
Supplement: Supplementary file 1 [file 12801350]

## Supplemental Analyses

### Experiment 1

#### Suitability of school tracks, assessment attributed to other teachers

We performed the same mixed 2 (Track) X 2 (Target's Gender) X 2 (Target's SES) ANOVA on this set of measures. Results indicated a main effect of Track,  $F(1, 95) = 5.12, p = .03, \eta^2_p = .05$ . Participants considered that other teachers would perceive the higher track ( $M = 4.54, SD = 1.33, [4.28, 4.80]$ ) as being more suitable for all targets than the lower track ( $M = 3.97, SD = 1.47, [3.68, 4.24]$ ). We also found the same interaction with Target's SES,  $F(1, 95) = 10.26, p = .002, \eta^2_p = .10$ . The lower track was deemed more suitable for the low-SES target ( $M = 4.44, SD = 1.32, [4.04, 4.83]$ ), than for the high-SES target ( $M = 3.48, SD = 1.47, [3.08, 3.88]$ ),  $F(1, 97) = 11.37, p < .001, \eta^2_p = .11$ , Cohen's  $d = 0.7$ . Symmetrically, participants thought teachers would prefer the higher track for high-SES targets ( $M = 4.88, SD = 1.31, [4.51, 5.25]$ ) than for low-SES targets ( $M = 4.20, SD = 1.26, [3.84, 4.56]$ ),  $F(1, 97) = 6.38, p = .01, \eta^2_p = .07$ , Cohen's  $d = 0.5$ . No other effects reached significance ( $F_s < 1.41; p > .24$ ).

#### Discussion

Respondents displayed a gap in tracking decision, whether they were answering for themselves in their capacity as teachers or for other teachers. The second measure was included to test if participants would distance their own decision from that of other teachers. Our results indicate that this was not the case. Although we cannot attest to whether this indicates a conscious perception of discrimination in the school tracking system, it does however suggest that they imagine other teachers would produce a tracking decision that artificially recreates the social class hierarchy despite achievement being equal.

### Experiment 2

#### Suitability of school tracks, assessment attributed to other teachers

We performed the same repeated-measure ANOVA on the assessment attributed to other teachers (i.e. "To what extent the other teachers making the decision would place the pupil in the lower vs. higher track?"). The main effect of tracks was not significant, indicating that participants did not think other teachers would favor one track over the other,

$F(1, 67) = 2.66, p = .11$ , but we did find the same interaction between the target's SES and the Track,  $F(1, 67) = 15.03, p < .001, \eta^2_p = .18$ . Once more, participants imagined other teachers would consider the low-SES target ( $M = 4.61, SD = 1.46, [4.15, 5.06]$ ) to be more suitable for the lower track than the high-SES target ( $M = 3.22, SD = 1.31, [2.73, 3.73]$ ),  $F(1, 67) = 16.68, p < .001, \eta^2_p = .20$ , Cohen's  $d = 1.0$ . For the higher track, the high-SES target ( $M = 4.97, SD = 1.28, [4.47, 5.46]$ ) was seen as more suitable than the low-SES pupil ( $M = 3.95, SD = 1.49, [3.45, 4.34]$ ),  $F(1, 68) = 9.18, p = .003, \eta^2_p = .12$ , Cohen's  $d = 0.8$ .

### **Suitability of school tracks, personal assessment with full sample ( $N = 90$ , 2 missing answers)**

We performed a 2 (Target's SES) X 2 (Track) ANOVA with the last factor as a repeated measure. First, we observed a significant main effect of Track,  $F(1, 86) = 19.28, p = .001, \eta^2_p = .18$ . Participants considered the higher track ( $M = 4.89, SD = 1.55, [4.63, 5.27]$ ) to be more suitable for all targets than the lower track ( $M = 3.49, SD = 1.74, [3.12, 3.86]$ ). The predicted interaction between Target's SES and Track was significant,  $F(1, 86) = 5.80, p = .02, \eta^2_p = .06$ . For the lower track, the low-SES target ( $M = 3.90, SD = 1.83, [3.42, 4.38]$ ) was perceived as being more suitable than the high-SES target ( $M = 3.08, SD = 1.53, [2.52, 3.63]$ ),  $F(1, 86) = 3.79, p = .03, \eta^2_p = .06$ , Cohen's  $d = 0.5$ , whereas for the higher track, the high-SES pupil ( $M = 5.36, SD = 1.39, [4.88, 5.83]$ ) was perceived as being more suitable than the low-SES pupil ( $M = 4.56, SD = 1.59, [4.14, 4.98]$ ),  $F(1, 86) = 6.17, p = .02, \eta^2_p = .07$ , Cohen's  $d = 0.5$ . The interaction between Target's SES and Gender was not tested given the imbalance in number of participants per condition in the full sample (only 20 participants saw the female targets).

## **Experiment 3**

### **Suitability of school tracks, assessment attributed to other teachers**

We tested our model with the suitability of tracks for other teachers (what participants imagined other teachers would decide). The main effect of Track was significant  $F(1, 155) = 21.16, p < .001, \eta^2 = .11$ , indicating that participants thought the higher track most suitable for all pupils ( $M = 4.60, SD = 1.36, [4.40, 4.80]$ ), than the lower track ( $M = 3.74, SD = 1.32, [3.55, 3.94]$ ). The interaction between Track and the planned linear contrast was significant,  $F(1, 155) = 25.40, p < .001, \eta^2 = .14$  but not the interaction with the second residual contrast,  $F < 1, n.s.$  However, the interaction between Track and the third residual contrast (the cubic

contrast) was also significant,  $F(1, 155) = 4.33, p = .04, \eta^2 = .02$ , which does not provide support for a linear pattern.

When decomposed for each Track, the results are as follows. For the lower track, the first contrast was significant,  $F(1, 155) = 23.04, p < .001, \eta^2 = .13$ , the second was not significant ( $F_s < 1$ ), and the third was marginally significant ( $F(1, 155) = 23.04, p = .09, \eta^2 = .13$ ). The means are ordered in the following way:  $M_{high-SES/selection} = 3.26, SD_{high-SES/selection} = 1.31, [2.86, 3.65], M_{high-SES/education} = 3.27, SD_{high-SES/education} = 1.16, [2.89, 3.65], M_{low-SES/education} = 4.13, SD_{low-SES/education} = 1.14, [3.73, 4.53]; M_{low-SES/selection} = 4.32, SD_{low-SES/selection} = 1.33, [3.93, 4.70]$ . For the higher track, the first contrast was significant,  $F(1, 155) = 23.04, p < .001, \eta^2 = .13$ , the second was not significant ( $F_s < 1$ ), and the third was marginally significant ( $F(1, 155) = 23.04, p = .06, \eta^2 = .13$ ). The order of the means is:  $M_{low-SES/education} = 4.03, SD_{low-SES/education} = 1.34, [3.61, 4.44]; M_{low-SES/selection} = 4.29, SD_{low-SES/selection} = 1.43, [3.89, 4.69]; M_{high-SES/education} = 4.95, SD_{high-SES/education} = 1.09, [4.55, 5.35], M_{high-SES/selection} = 5.13, SD_{high-SES/selection} = 1.30, [4.71, 5.54]$

## Supplemental Materials

### Experiment 1

4 experimental Conditions:

- Target' SES: Low vs. High
- Target' Gender: Male vs. Female

Common sections in all conditions in Experiment 1:

- Description of the tracking system in Switzerland: grade requirements for each track and academic consequences of tracking for students  
.....p.3
- Instruction for borderline cases (i.e. students who are slightly below requirements)..p.4
- Student Academic file: grades and teacher's comment about student's behavior.....p.6
- Measures of suitability of  
Tracks.....p.7
- Questionnaire about perceived importance of success factors in school.....p.8
- Manipulation  
checks.....p.9
- Socio-demographic  
questions.....p.10

Manipulation (i.e. varying sections depending on experimental conditions)

- Target description: Student administrative file and description of student's extra-curricular activities
  1. Low-SES  
Male.....p.5
  2. High-SES  
Male.....p.11
  3. Low-SES Female.....p.12
  4. High-SES  
Female.....p.13

## **Experiment 2**

2 experimental Conditions:

- Target' SES: Low vs. High

Common sections in all conditions = Experiment 1

Manipulation (i.e. varying sections depending on experimental conditions)

- Target description: Student administrative file and description of student's extra-curricular activities
  1. Low-SES
    - Male.....p.14
  2. High-SES
    - Male.....p.15

## **Experiment 3**

8 experimental Conditions:

- Target' SES: Low vs. High = Experiment 1
- Target' Gender: Male vs. Female = Experiment 1
- Institutional Function: Selection vs. Educational

Common sections in all conditions = Experiment 1

Manipulation (i.e. varying sections depending on experimental conditions)

- Description of the Swiss educational system (presented together with the description of tracking system)
  1. Selection Function.....p.16
  2. Educational Function.....p.17

## Experiment 1

### 1° Low-SES Male Condition (Complete Material)

*Description of the tracking system in Switzerland:*

Voici le scénario que l'on vous propose :

**Imaginez que vous êtes un(e) enseignant(e) à l'école primaire.**

Prenez quelques secondes pour imaginer que vous êtes dans la peau de cette personne.

A chaque fin d'année, la direction de l'école demande aux enseignants de participer à la conférence des maîtres. La conférence des maîtres est une réunion au cours de laquelle les enseignants discutent ensemble de dossiers d'élèves qui sont arrivés au terme de leurs études primaires (fin 6<sup>ème</sup> primaire) afin de décider de leur orientation scolaire.

Dans le canton de Vaud, à l'issue des études primaires, les élèves sont orientés vers une des deux voies scolaires :

- La voie «prégymnasiale» accueillera les élèves qui pourront accéder directement aux études de maturité gymnasiale (baccalauréat) s'ils obtiennent leur certificat d'études. Cette voie scolaire prépare à la poursuite d'études supérieures
- La voie «générale» accueillera les élèves qui se destinent principalement aux écoles de culture générale et de commerce, ainsi qu'à la formation professionnelle (apprentissage).

Les décisions d'orientation suivent des exigences précises :

- Pour accéder à la voie prégymnasiale, la moyenne générale de l'élève doit être au minimum une moyenne de 4.75
- Les élèves qui ne répondent pas à ces critères sont orientés en voie générale.

Questions :

Si un élève a une moyenne de 4.5, il sera plutôt orienté vers :

- ☐ La voie prégymnasiale
- ☐ La voie générale

La voie générale donne accès à :

- ☐ Une formation professionnelle (apprentissage)
- ☐ Une formation universitaire

*Instruction about borderline cases:*

Bien que les exigences pour les voies scolaires soient d'ordinaire très claires, il arrive parfois de rencontrer parmi les élèves, certains « **cas limites** ». Dans le canton de Vaud, les cas limites sont:

- Des cas où les résultats de l'élève sont de très peu inférieurs à ceux qui sont nécessaires pour passer dans la voie prégyrnasiale.
- Dans ce cas, la conférence des maîtres examine d'office si une admission à cette voie apparaît ou non pertinente.
- La décision doit être motivée *en fonction de chaque situation*. Il ne peut être question d'accorder systématiquement, ni de refuser systématiquement une admission à la voie prégyrnasiale.

**Imaginez désormais que vous êtes présent à la conférence des maîtres, en tant qu'enseignant(e).**

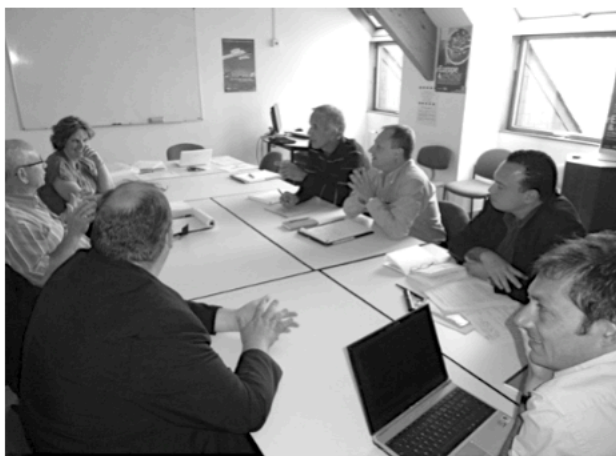

Ci-dessous vous trouverez le dossier d'un élève, qui est mis à disposition de tous les enseignants présents à la conférence. **Prenez bien connaissance des informations données**, nous vous poserons ultérieurement des questions sur votre connaissance du dossier. Nous vous demanderons également de donner votre avis sur ce cas limite et d'indiquer quelle est la meilleure voie pour cet élève, selon vous.

Question :

Que faut-il faire avec un « cas limite » ? (Une seule bonne réponse)

- ☐ Laisser passer l'élève automatiquement en voie prégyrnasiale
- ☐ Laisser automatiquement l'élève poursuivre en voie générale
- ☐ Laisser la décision aux enseignants présents à la conférence des maîtres

Target description:

## Dossier Administratif

### 1) ELEVE

|                                                               |                                                                         |
|---------------------------------------------------------------|-------------------------------------------------------------------------|
| Nom : <u>Bétrisey</u><br>(dénomination officielle)            | Prénom : <u>Bryan</u>                                                   |
| Naissance (jour, mois, année) : <u>23</u> <u>06</u> <u>01</u> | Sexe : F <input type="checkbox"/> M <input checked="" type="checkbox"/> |
| Domicile : Rue : <u>Chemin des Estournelles</u>               | N° Postal <u>1003</u> Localité : <u>Lausanne</u>                        |
| Commune d'origine: <u>Renens (VD)</u>                         | Nationalité (pays) : <u>Suisse</u>                                      |

### 2) COMPOSITION FAMILIALE

|                                                                    |                                                                    |
|--------------------------------------------------------------------|--------------------------------------------------------------------|
| <u>Père</u>                                                        | <u>Mère</u>                                                        |
| Nom : <u>Bétrisey</u>                                              | Nom : <u>Bétrisey</u>                                              |
| Prénom : <u>Rémy</u>                                               | Prénom : <u>Corinne</u>                                            |
| Adresse : <u>Chemin des Estournelles 9</u><br><u>1003 Lausanne</u> | Adresse : <u>Chemin des Estournelles 9</u><br><u>1003 Lausanne</u> |
| Téléphone : <u>021 316 99 33</u>                                   | Téléphone : <u>021 316 99 33</u>                                   |
| Profession : <u>Ouvrier du bâtiment</u>                            | Profession : <u>Employée de restauration</u>                       |
| Nombre de frères et sœurs : <u>4</u>                               |                                                                    |

Puisque vous ne connaissez pas personnellement cet élève, voici quelques informations supplémentaires pour vous aider à vous le représenter.

Bryan est un jeune garçon de 11 ans. A la sortie de l'école, Bryan aime bien rester discuter avec ses amis dans le préau de l'école. Il rentre généralement de l'école à pied. Lorsqu'il arrive à la maison, Bryan apprécie beaucoup d'écouter de la musique ou de regarder la télévision, en particulier son émission favorite *Les anges de la télé-réalité*. Son film préféré de l'année dernière était *Intouchables*. Le week-end, il fait du sport à la maison de quartier, où il joue avec ses amis. Cette année pour son anniversaire, les parents de Bryan l'ont emmené avec ses frères et sœurs à Aqua Parc.



*Student Academic File:*

---

**BULLETIN SCOLAIRE**

---

**Année scolaire 2012-2013**

---

**Ecole :** Etablissement scolaire primaire des Estournelles

**Elève :** Bryan Bétrisey

**Année de scolarité :** 6<sup>ème</sup> primaire

---

**Résultats annuels**

---

|                    |             |
|--------------------|-------------|
| Français           | 4.5         |
| Mathématiques      | 5           |
| Allemand           | 4.5         |
| Sciences           | 4.5         |
| Moyenne générale : | <b>4.61</b> |

---

Commentaire de l'Enseignant :

Bryan est un élève qui généralement s'entend bien avec ses camarades. Il est habituellement motivé, même s'il est parfois un peu dissipé. C'est un élève plutôt attentif, toutefois il a tendance à être un peu rêveur. Dans l'ensemble, les performances de Bryan sont convenables.

## Measures of suitability of Tracks:

### Résumé de la situation :

Les dispositions cantonales exigent que l'élève atteigne 4.75 de moyenne. Dans le cas présent, Bryan est considéré comme un cas limite puisqu'il a obtenu une moyenne générale de 4.61.

Nous vous demandons de prendre position sur la situation de Bryan. Il n'y a pas de bonne ou de mauvaise réponse, nous cherchons seulement à comprendre comment les gens traitent les informations pour prendre une décision.

*Veillez entourer le chiffre correspondant sur l'échelle de 1 à 7 ci-dessous.*

**Selon vous, Bryan devrait être orienté vers :**

- La voie générale

Pas du tout  
d'accord

|   |   |   |   |   |   |   |
|---|---|---|---|---|---|---|
| 1 | 2 | 3 | 4 | 5 | 6 | 7 |
|---|---|---|---|---|---|---|

Tout à fait  
d'accord

- La voie prégyrnasiale

Pas du tout  
d'accord

|   |   |   |   |   |   |   |
|---|---|---|---|---|---|---|
| 1 | 2 | 3 | 4 | 5 | 6 | 7 |
|---|---|---|---|---|---|---|

Tout à fait  
d'accord

**D'après vous, les autres enseignants de la conférence des maîtres orienteront Bryan vers :**

- La voie générale

Pas du tout

|   |   |   |   |   |   |   |
|---|---|---|---|---|---|---|
| 1 | 2 | 3 | 4 | 5 | 6 | 7 |
|---|---|---|---|---|---|---|

Certainement

- La voie prégyrnasiale

Pas du tout

|   |   |   |   |   |   |   |
|---|---|---|---|---|---|---|
| 1 | 2 | 3 | 4 | 5 | 6 | 7 |
|---|---|---|---|---|---|---|

Certainement

**D'après vous, quelle sera la décision de la direction de l'école :**

- La voie générale

Pas du tout 

|   |   |   |   |   |   |   |
|---|---|---|---|---|---|---|
| 1 | 2 | 3 | 4 | 5 | 6 | 7 |
|---|---|---|---|---|---|---|

 Certainement

- La voie prégyrnasiale

Pas du tout 

|   |   |   |   |   |   |   |
|---|---|---|---|---|---|---|
| 1 | 2 | 3 | 4 | 5 | 6 | 7 |
|---|---|---|---|---|---|---|

 Certainement

**Dans l'hypothèse où Bryan serait orienté vers la voie générale, dans quelle mesure pensez-vous que les parents de Bryan seraient d'accord avec cette orientation ?**

Pas du tout 

|   |   |   |   |   |   |   |
|---|---|---|---|---|---|---|
| 1 | 2 | 3 | 4 | 5 | 6 | 7 |
|---|---|---|---|---|---|---|

 Certainement

**Dans l'hypothèse où Bryan serait orienté vers la voie prégyrnasiale, dans quelle mesure pensez-vous que les parents de Bryan seraient d'accord avec cette orientation ?**

Pas du tout 

|   |   |   |   |   |   |   |
|---|---|---|---|---|---|---|
| 1 | 2 | 3 | 4 | 5 | 6 | 7 |
|---|---|---|---|---|---|---|

 Certainement

*Questionnaire about perceived importance of success factors in school:*

**Réfléchissez maintenant au système éducatif en général.**

(Cette question ne concerne pas le cas spécifique de Bryan)

Dans quelle mesure, pensez-vous que la performance scolaire des élèves est déterminée par :

- l'effort fourni par l'élève

Pas du tout 

|   |   |   |   |   |   |   |
|---|---|---|---|---|---|---|
| 1 | 2 | 3 | 4 | 5 | 6 | 7 |
|---|---|---|---|---|---|---|

 Complètement

- l'intelligence de l'élève

Pas du tout 

|   |   |   |   |   |   |   |
|---|---|---|---|---|---|---|
| 1 | 2 | 3 | 4 | 5 | 6 | 7 |
|---|---|---|---|---|---|---|

 Complètement

- les enseignants de l'élève

Pas du tout 

|   |   |   |   |   |   |   |
|---|---|---|---|---|---|---|
| 1 | 2 | 3 | 4 | 5 | 6 | 7 |
|---|---|---|---|---|---|---|

 Complètement

- les connaissances de l'élève

Pas du tout 

|   |   |   |   |   |   |   |
|---|---|---|---|---|---|---|
| 1 | 2 | 3 | 4 | 5 | 6 | 7 |
|---|---|---|---|---|---|---|

 Complètement

- le milieu social de l'élève

Pas du tout 

|   |   |   |   |   |   |   |
|---|---|---|---|---|---|---|
| 1 | 2 | 3 | 4 | 5 | 6 | 7 |
|---|---|---|---|---|---|---|

 Complètement

- la personnalité de l'élève

Pas du tout 

|   |   |   |   |   |   |   |
|---|---|---|---|---|---|---|
| 1 | 2 | 3 | 4 | 5 | 6 | 7 |
|---|---|---|---|---|---|---|

 Complètement

- l'environnement familial de l'élève

Pas du tout 

|   |   |   |   |   |   |   |
|---|---|---|---|---|---|---|
| 1 | 2 | 3 | 4 | 5 | 6 | 7 |
|---|---|---|---|---|---|---|

 Complètement

- la nationalité d'origine de l'élève

Pas du tout 

|   |   |   |   |   |   |   |
|---|---|---|---|---|---|---|
| 1 | 2 | 3 | 4 | 5 | 6 | 7 |
|---|---|---|---|---|---|---|

 Complètement

*Manipulation checks:*

**Rappelez vous des informations que vous avez eues à propos de Bryan**

**D'après les informations données, la moyenne générale de Bryan était de**

- ☐ 4.51
- ☐ 4.61
- ☐ 4.71

**D'après les informations données, Bryan rentre de la maison**

- ☐ en voiture
- ☐ à pied
- ☐ à vélo

**D'après le commentaire de l'enseignant, Bryan avait tendance à être un peu:**

- ☐ timide
- ☐ bavard
- ☐ rêveur

**D'après les informations données, son film préféré est :**

- ☐ Intouchables
- ☐ Bienvenue chez les ch'tis
- ☐ Astérix aux jeux olympiques

**D'après les informations données, Bryan provient d'un milieu:**

| 1                   | 2           | 3                     | 4     | 5                  | 6        | 7                |
|---------------------|-------------|-----------------------|-------|--------------------|----------|------------------|
| Très<br>désavantagé | Désavantagé | Plutôt<br>désavantagé | Moyen | Plutôt<br>avantagé | Avantagé | Très<br>avantagé |

*Socio-demographic questions:*

**Maintenant, merci de répondre à ces quelques questions à propos de vous.**

Sexe : ( ) Féminin ( ) Masculin      Année de Naissance : .....

Filière d'Etude : .....

Année d'Etude : .....

Langue Maternelle : .....

Nationalité(s) : .....

**Veuillez indiquer le diplôme le plus élevé de votre mère:**

- ☐ Sans Diplôme
- ☐ Diplôme de fin d'études obligatoires
- ☐ Diplôme Certificat Fédéral de Capacité (Apprentissage professionnel ou équivalent)
- ☐ Diplôme d'une école de commerce ou de culture générale
- ☐ Diplôme de Maturité (ou baccalauréat, ou équivalent)
- ☐ Diplôme universitaire

**Veuillez indiquer le diplôme le plus élevé de votre père:**

- ☐ Sans Diplôme
- ☐ Diplôme de fin d'études obligatoires
- ☐ Diplôme Certificat Fédéral de Capacité (Apprentissage professionnel ou équivalent)
- ☐ Diplôme d'une école de commerce ou de culture générale
- ☐ Diplôme de Maturité (ou baccalauréat, ou équivalent)
- ☐ Diplôme universitaire

**Veuillez indiquer la profession exercée par chacun de vos parents (essayez d'être le/la plus précis(e) possible):**

Mère : .....

Père : .....

**Bénéficiez-vous d'une bourse pour vos études?**

- ☐ Oui, car mes parents ont un revenu assez bas
- ☐ Oui, pour une autre raison
- ☐ Non

Avec tous nos remerciements pour votre participation !

# Experiment 1

## 2° High-SES Male (Partial Material)

Target description:

### Dossier Administratif

#### 1) ELEVE

|                                                               |                                                                         |
|---------------------------------------------------------------|-------------------------------------------------------------------------|
| Nom : <u>Demierre</u><br>(dénomination officielle)            | Prénom : <u>Louis</u>                                                   |
| Naissance (jour, mois, année) : <u>23</u> <u>06</u> <u>01</u> | Sexe : F <input type="checkbox"/> M <input checked="" type="checkbox"/> |
| Domicile : Rue : <u>Chemin des Estournelles 9</u>             | N° Postal <u>1003</u> Localité : <u>Lausanne</u>                        |
| Commune d'origine: <u>Pully (VD)</u>                          | Nationalité (pays) : <u>Suisse</u>                                      |

#### 2) COMPOSITION FAMILIALE

|                                                                    |                                                                    |
|--------------------------------------------------------------------|--------------------------------------------------------------------|
| <u>Père</u>                                                        | <u>Mère</u>                                                        |
| Nom : <u>Demierre</u>                                              | Nom : <u>Demierre</u>                                              |
| Prénom : <u>François</u>                                           | Prénom : <u>Christine</u>                                          |
| Adresse : <u>Chemin des Estournelles 9</u><br><u>1003 Lausanne</u> | Adresse : <u>Chemin des Estournelles 9</u><br><u>1003 Lausanne</u> |
| Téléphone : <u>021 721 22 50</u>                                   | Téléphone : <u>021 721 22 50</u>                                   |
| Profession : <u>Architecte</u>                                     | Profession : <u>Responsable marketing</u>                          |
| Nombre de frères et sœurs : <u>1</u>                               |                                                                    |

Puisque vous ne connaissez pas personnellement cet élève, voici quelques informations supplémentaires pour vous aider à vous le représenter.

Louis Demierre est un jeune garçon de 11 ans. Habituellement, Louis rentre de l'école à pied. Lorsqu'il arrive à la maison, il aime travailler ses gammes au piano. Le soir, Louis aime bien écouter de la musique ou passer du temps à lire. Son livre de chevet favori est *Le chien des Baskerville*. Son film préféré de l'année dernière était *Intouchables*. Le week-end, il est inscrit au tennis-club de son quartier dans lequel il joue en simple. Cette année pour son anniversaire, les parents de Louis l'ont emmené lui et sa petite sœur à Londres.

## Experiment 1

### 3° Low-SES Female (Partial Material)

Target description:

#### Dossier Administratif

##### 1) ELEVE

|                                                               |                                                                         |
|---------------------------------------------------------------|-------------------------------------------------------------------------|
| Nom : <u>Bétrisey</u><br>(dénomination officielle)            | Prénom : <u>Cindy</u>                                                   |
| Naissance (jour, mois, année) : <u>23</u> <u>06</u> <u>01</u> | Sexe : F <input checked="" type="checkbox"/> M <input type="checkbox"/> |
| Domicile : Rue : <u>Chemin des Estournelles</u>               | N° Postal <u>1003</u> Localité : <u>Lausanne</u>                        |
| Commune d'origine: <u>Renens (VD)</u>                         | Nationalité (pays) : <u>Suisse</u>                                      |

##### 2) COMPOSITION FAMILIALE

|                                                                    |                                                                    |
|--------------------------------------------------------------------|--------------------------------------------------------------------|
| <u>Père</u>                                                        | <u>Mère</u>                                                        |
| Nom : <u>Bétrisey</u>                                              | Nom : <u>Bétrisey</u>                                              |
| Prénom : <u>Rémy</u>                                               | Prénom : <u>Corinne</u>                                            |
| Adresse : <u>Chemin des Estournelles 9</u><br><u>1003 Lausanne</u> | Adresse : <u>Chemin des Estournelles 9</u><br><u>1003 Lausanne</u> |
| Téléphone : <u>021 316 99 33</u>                                   | Téléphone : <u>021 316 99 33</u>                                   |
| Profession : <u>Ouvrier du bâtiment</u>                            | Profession : <u>Employée de restauration</u>                       |
| Nombre de frères et sœurs : <u>4</u>                               |                                                                    |

Puisque vous ne connaissez pas personnellement cette élève, voici quelques informations supplémentaires pour vous aider à vous le représenter.

Cindy Bétrisey est une jeune fille de 11 ans. En sortant de l'école, elle aime bien rester avec ses amies dans le préau. Habituellement, Cindy rentre de l'école à pied. Lorsqu'elle arrive à la maison, elle aime bien écouter de la musique ou passer du temps à regarder la télévision, en particulier son émission favorite *Les anges de la télé-réalité*. Son film préféré de l'année dernière était *Intouchables*. Le week-end, elle fait du sport à la maison de quartier, où elle joue avec ses amies. Cette année pour son anniversaire, les parents de Cindy l'ont emmenée avec ses frères et soeurs à Aqua Parc.



## Experiment 1

### 4° High-SES Female (Partial Material)

Target description:

#### Dossier Administratif

##### 1) ELEVE

|                                                               |                                                                         |
|---------------------------------------------------------------|-------------------------------------------------------------------------|
| Nom : <u>Demierre</u><br>(dénomination officielle)            | Prénom : <u>Charlotte</u>                                               |
| Naissance (jour, mois, année) : <u>23</u> <u>06</u> <u>01</u> | Sexe : F <input checked="" type="checkbox"/> M <input type="checkbox"/> |
| Domicile : Rue : <u>Chemin des Estournelles 9</u>             | N° Postal <u>1003</u> Localité : <u>Lausanne</u>                        |
| Commune d'origine: <u>Pully (VD)</u>                          | Nationalité (pays) : <u>Suisse</u>                                      |

##### 2) COMPOSITION FAMILIALE

|                                                                    |                                                                    |
|--------------------------------------------------------------------|--------------------------------------------------------------------|
| <u>Père</u>                                                        | <u>Mère</u>                                                        |
| Nom : <u>Demierre</u>                                              | Nom : <u>Demierre</u>                                              |
| Prénom : <u>François</u>                                           | Prénom : <u>Christine</u>                                          |
| Adresse : <u>Chemin des Estournelles 9</u><br><u>1003 Lausanne</u> | Adresse : <u>Chemin des Estournelles 9</u><br><u>1003 Lausanne</u> |
| Téléphone : <u>021 721 22 50</u>                                   | Téléphone : <u>021 721 22 50</u>                                   |
| Profession : <u>Architecte</u>                                     | Profession : <u>Responsable marketing</u>                          |
| Nombre de frères et sœurs : <u>1</u>                               |                                                                    |

Puisque vous ne connaissez pas personnellement cette élève, voici quelques informations supplémentaires pour vous aider à vous le représenter.

Charlotte Demierre est une jeune fille de 11 ans. Habituellement, Charlotte rentre de l'école à pied. Lorsqu'elle arrive à la maison, elle aime travailler ses gammes au piano. Le soir, Charlotte aime bien écouter de la musique ou passer du temps à lire. Son livre de chevet favori est *Le chien des Baskerville*. Son film préféré de l'année dernière était *Intouchables*. Le week-end, elle est inscrite au tennis-club de son quartier dans lequel elle joue en simple. Cette année pour son anniversaire, les parents de Charlotte l'ont emmenée elle et sa petite sœur à Londres.

## Experiment 2

### 1° Low-SES (Partial Material)

*Target description:*

#### BULLETIN SCOLAIRE

Année scolaire 2012-2013

**Ecole** : Etablissement scolaire primaire des Estournelles

**Elève** : Bryan Bétrisey

**Année de scolarité** : 6<sup>ème</sup> année primaire

Résultats annuels

|                         |                    |
|-------------------------|--------------------|
| <b>Groupe 1</b>         |                    |
| *Français               | 5                  |
| *Mathématiques          | 4.5                |
| *Allemand               | 4.5                |
| Sciences                | 4.5                |
| <b>Moyenne groupe 1</b> | <b>18,5 points</b> |

|                         |                 |
|-------------------------|-----------------|
| <b>Groupe 2</b>         |                 |
| Géographie              | 4               |
| Histoire                | 5               |
| <b>Moyenne groupe 2</b> | <b>9 points</b> |

Moyenne annuelle, exemple de calcul :

\*Moyenne des notes obtenues en classe 4.8

\*\*Note de l'ECR 4.5

Calcul :  $(4.8 \times 0.7) + (4.5 \times 0.3) = 4.71$  Moyenne annuelle finale (arrondie au 1/2 point) 4.5

Commentaire de l'Enseignant,e :

Bryan est un élève qui généralement s'entend bien avec ses camarades. Il est habituellement motivé, même s'il est parfois un peu dissipé. C'est un élève plutôt attentif, toutefois il a tendance à être un peu rêveur. Dans l'ensemble, les performances de Bryan sont convenables.

## Experiment 2

### 2° High-SES (Partial Material)

*Target description:*

#### BULLETIN SCOLAIRE

Année scolaire 2012-2013

**Ecole :** Etablissement scolaire primaire des Estournelles

**Elève :** Louis Demierre

**Année de scolarité :** 6<sup>ème</sup> année primaire

##### Résultats annuels

|                         |                    |
|-------------------------|--------------------|
| <b>Groupe 1</b>         |                    |
| *Français               | 5                  |
| *Mathématiques          | 4.5                |
| *Allemand               | 4.5                |
| Sciences                | 4.5                |
| <b>Moyenne groupe 1</b> | <b>18,5 points</b> |
| <b>Groupe 2</b>         |                    |
| Géographie              | 4                  |
| Histoire                | 5                  |
| <b>Moyenne groupe 2</b> | <b>9 points</b>    |

Moyenne annuelle, exemple de calcul :

\*Moyenne des notes obtenues en classe 4.8

\*\*Note de l'ECR 4.5

Calcul :  $(4.8 \times 0.7) + (4.5 \times 0.3) = 4.71$  Moyenne annuelle finale (arrondie au 1/2 point) 4.5

Commentaire de l'Enseignant,e :

Louis est un élève qui généralement s'entend bien avec ses camarades. Il est habituellement motivé, même s'il est parfois un peu dissipé. C'est un élève plutôt attentif, toutefois il a tendance à être un peu rêveur. Dans l'ensemble, les performances de Louis sont convenables.

## Experiment 3

### 1° Selection Function (Partial Material)

*Description of Swiss educational system:*

Voici le scénario que l'on vous propose :

**Imaginez que vous êtes un(e) enseignant(e) à l'école primaire.**

Prenez quelques secondes pour imaginer que vous êtes dans la peau de cette personne.

En Suisse, le système scolaire obligatoire comprend les degrés primaire et secondaire. L'école suisse est basée sur les principes de la gratuité de l'enseignement et de la sélection, dans l'effort de conduire chaque élève au maximum de ses possibilités. Les élèves sont donc orientés selon leurs aptitudes scolaires afin que chacun ait la possibilité d'atteindre le maximum de ses potentialités. Les études PISA ont démontré que le système suisse produit de bons résultats.

Au sein du système scolaire suisse, à chaque fin d'année, la direction de l'école demande aux enseignants de participer à la conférence des maîtres. La conférence des maîtres est une réunion au cours de laquelle les enseignants discutent ensemble de dossiers d'élèves qui sont arrivés au terme de leurs études primaires (fin 6<sup>ème</sup> primaire, ou 8<sup>ème</sup> Harmos) afin de décider de leur orientation scolaire.

Dans le canton de Vaud, à l'issue des études primaires, les élèves sont orientés vers une des deux voies scolaires :

- La voie «prégymnasiale» accueillera les élèves qui pourront accéder directement aux études de maturité gymnasiale (baccalauréat) s'ils obtiennent leur certificat d'études. Cette voie scolaire prépare à la poursuite d'études supérieures
- La voie «générale» accueillera les élèves qui se destinent principalement aux écoles de culture générale et de commerce, ainsi qu'à la formation professionnelle (apprentissage).

Les décisions d'orientation suivent des exigences précises :

- Pour accéder à la voie prégymnasiale, la moyenne générale de l'élève doit être au minimum une moyenne de 4.75
- Les élèves qui ne répondent pas à ces critères sont orientés en voie générale.

## Experiment 3

### 2° Selection Function (Partial Material)

*Description of Swiss educational system:*

Voici le scénario que l'on vous propose :

**Imaginez que vous êtes un(e) enseignant(e) à l'école primaire.**

Prenez quelques secondes pour imaginer que vous êtes dans la peau de cette personne.

En Suisse, le système scolaire obligatoire comprend les degrés primaire et secondaire. L'école suisse est basée sur les principes de la gratuité de l'enseignement et de la formation, qui intègre des tâches d'éducation et d'instruction permettant à tous les élèves d'apprendre, et d'apprendre à apprendre. Les élèves sont donc formés pour qu'ils développent leurs savoirs et qu'ils aient la possibilité de progresser dans la maîtrise de leurs connaissances. Les études PISA ont démontré que le système suisse produit de bons résultats.

Au sein du système scolaire suisse, à chaque fin d'année, la direction de l'école demande aux enseignants de participer à la conférence des maîtres. La conférence des maîtres est une réunion au cours de laquelle les enseignants discutent ensemble de dossiers d'élèves qui sont arrivés au terme de leurs études primaires (fin 6<sup>ème</sup> primaire, ou 8<sup>ème</sup> Harmos) afin de décider de leur orientation scolaire.

Dans le canton de Vaud, à l'issue des études primaires, les élèves sont orientés vers une des deux voies scolaires :

- La voie «prégymnasiale» accueillera les élèves qui pourront accéder directement aux études de maturité gymnasiale (baccalauréat) s'ils obtiennent leur certificat d'études. Cette voie scolaire prépare à la poursuite d'études supérieures
- La voie «générale» accueillera les élèves qui se destinent principalement aux écoles de culture générale et de commerce, ainsi qu'à la formation professionnelle (apprentissage).

Les décisions d'orientation suivent des exigences précises :

- Pour accéder à la voie prégymnasiale, la moyenne générale de l'élève doit être au minimum une moyenne de 4.75
- Les élèves qui ne répondent pas à ces critères sont orientés en voie générale.
